# Supplementary material for: Microbeads preparation with reversed-phase microemulsion and ultraviolet light curing for digital encoding suspension array
Source: Royal Society of Chemistry journal article supplement (doi:10.1039/c7ra00894e), 2017-01-01
Supplement: c7ra00894e1.pdf [file c7ra00894e1.pdf]

## Electronic Supplementary Information

The micrograph of prepared microbeads for size distribution

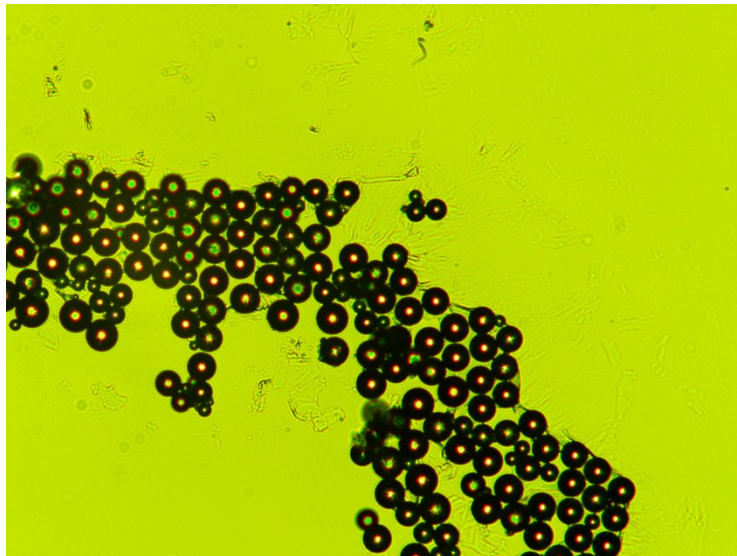

**The data of diameters of prepared microbeads**

|        |
|--------|
| 20.736 |
| 20.808 |
| 21.006 |
| 21.087 |
| 21.402 |
| 21.411 |
| 21.69  |
| 21.816 |
| 21.816 |
| 21.942 |
| 21.942 |
| 21.996 |
| 22.05  |
| 22.14  |
| 22.212 |
| 22.293 |
| 22.329 |
| 22.347 |
| 22.383 |
| 22.383 |
| 22.509 |
| 22.572 |
| 22.653 |
| 22.698 |
| 22.734 |
| 22.743 |
| 22.752 |
| 22.779 |
| 22.833 |
| 22.887 |
| 22.941 |
| 22.941 |
| 22.968 |
| 22.986 |
| 23.103 |
| 23.112 |
| 23.175 |
| 23.202 |
| 23.211 |
| 23.319 |
| 23.319 |

|        |
|--------|
| 23.346 |
| 23.355 |
| 23.382 |
| 23.4   |
| 23.526 |
| 23.535 |
| 23.553 |
| 23.562 |
| 23.607 |
| 23.76  |
| 23.769 |
| 23.814 |
| 23.85  |
| 23.877 |
| 23.922 |
| 23.931 |
| 23.931 |
| 23.967 |
| 23.994 |
| 24.174 |
| 24.183 |
| 24.21  |
| 24.309 |
| 24.507 |
| 24.507 |
| 24.561 |
| 24.588 |
| 24.705 |
| 24.741 |
| 24.759 |
| 24.795 |
| 24.903 |
| 24.921 |
| 24.975 |
| 25.029 |
| 25.191 |
| 25.227 |
| 25.245 |
| 25.245 |
| 25.335 |
| 25.614 |
| 25.668 |
| 26.172 |

|        |
|--------|
| 26.199 |
| 26.244 |
| 26.433 |
| 26.505 |
| 26.937 |
